# Supplementary material for: Potential Neuroprotective Mechanisms of Methamphetamine Treatment in Traumatic Brain Injury Defined by Large-Scale IonStar-Based Quantitative Proteomics
Source: MDPI journal article supplement (doi:10.3390/ijms22052246), 2021-02-24
Supplement: s1 [file s1]

# Potential Neuroprotective Mechanisms of Methamphetamine Treatment in Traumatic Brain Injury Defined by Large-Scale IonStar-Based Quantitative Proteomics

Shichen Shen <sup>1,2</sup>, Ming Zhang <sup>1,2</sup>, Min Ma <sup>2,3</sup>, Sailee Rasam <sup>2,4</sup>, David Poulsen <sup>5</sup> and Jun Qu <sup>1,2,\*</sup>

<sup>1</sup> Department of Pharmaceutical Sciences, University at Buffalo, Buffalo, NY 14214, USA; [ShichenS@buffalo.edu](mailto:ShichenS@buffalo.edu) (S.S); [MZhang25@buffalo.edu](mailto:MZhang25@buffalo.edu) (M.Z); [JunQu@buffalo.edu](mailto:JunQu@buffalo.edu) (J.Q)

<sup>2</sup> New York State Center of Excellence in Bioinformatics and Life Sciences, Buffalo, NY 14203, USA

<sup>3</sup> Department of Cell Stress Biology, Roswell Park Comprehensive Cancer Institute, Buffalo, NY 14203, USA; [MinMa@buffalo.edu](mailto:MinMa@buffalo.edu) (M.M)

<sup>4</sup> Department of Biochemistry, Jacobs School of Medicine and Biomedical Sciences, Buffalo, NY 14203, USA; [SaileeSu@buffalo.edu](mailto:SaileeSu@buffalo.edu) (S.S)

<sup>5</sup> Department of Neurosurgery, Jacobs School of Medicine and Biomedical Sciences, Buffalo, NY 14203, USA; [DavidPou@buffalo.edu](mailto:DavidPou@buffalo.edu) (D.P)

## Supplementary Materials

Supplementary Figure S1 – S5.

Supplementary Table S1 – S4.

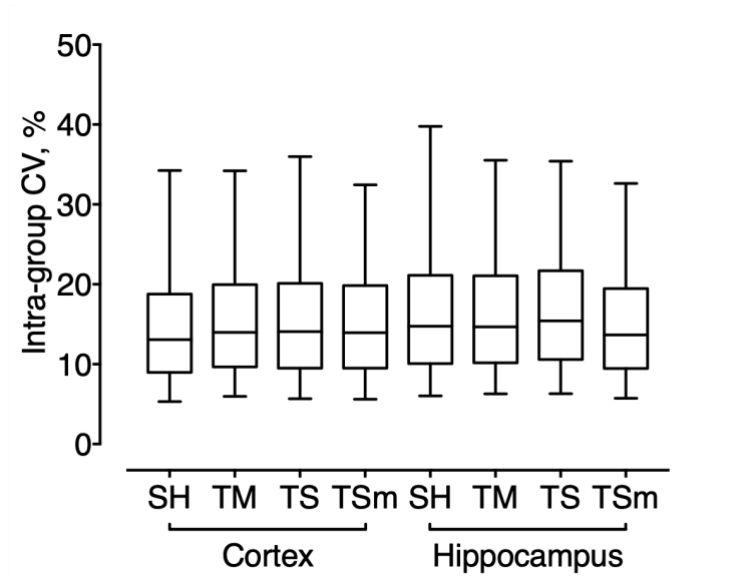

**Supplementary Figure S1.** Intra-group coefficient of variation (CV) of biological replicates from cortex and hippocampus.

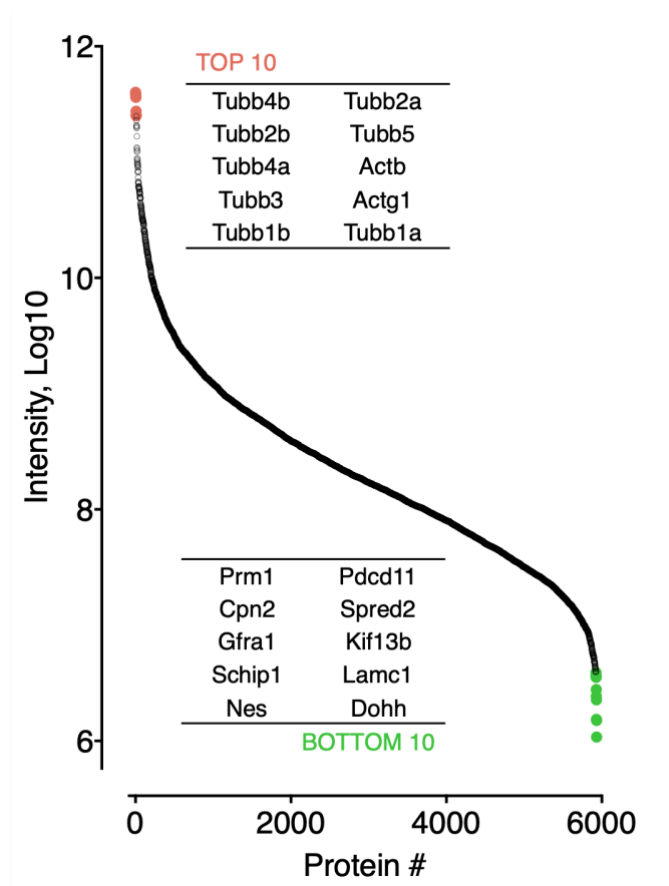

**Supplementary Figure S2.** Abundance rank of proteins quantified in the study. Proteins with the highest (TOP10) and lowest (BOTTOM10) abundances are highlighted.

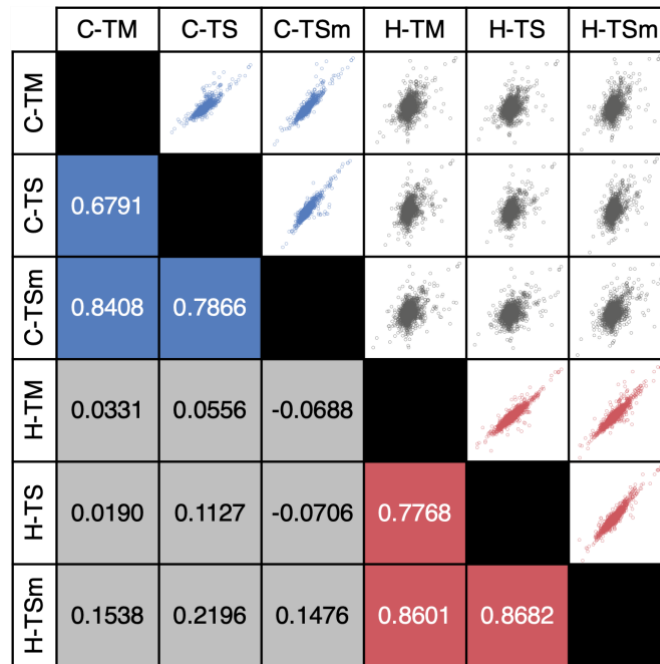

**Supplementary Figure S3.** R-squared values from Pearson correlation of protein ratios (compared to the SH group).

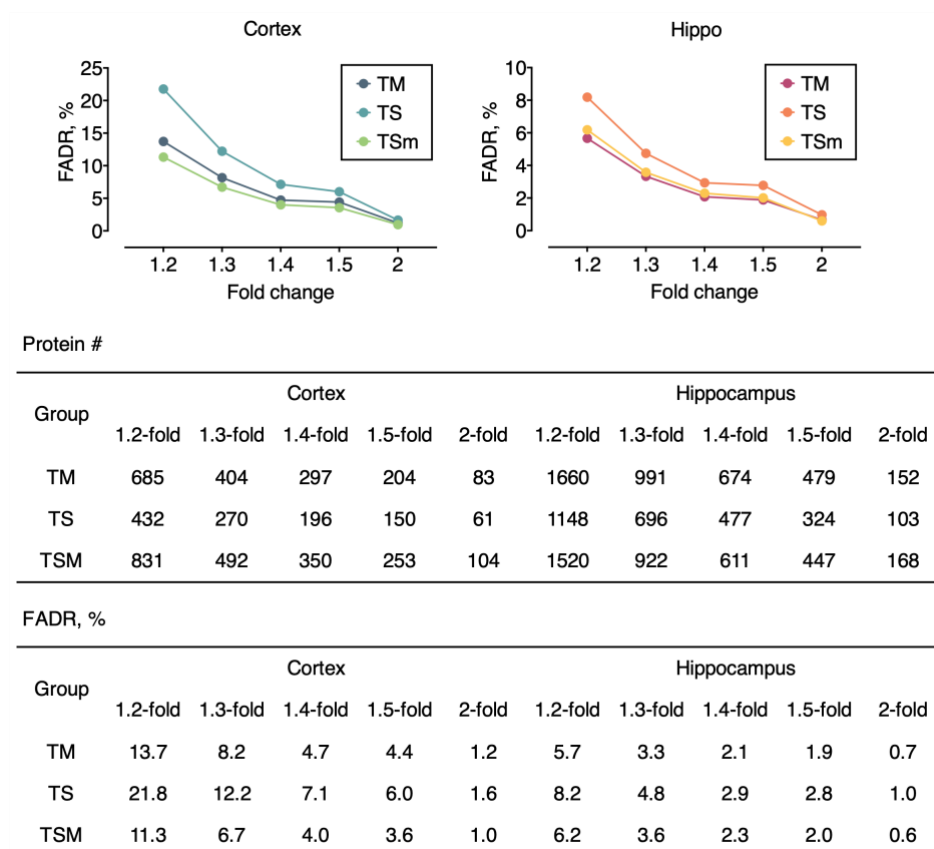

**Supplementary Figure S4.** Optimization of protein fold change (FC) thresholds for determining altered proteins (APs) using an Experimental Null (EN) method. 1.4-fold protein FC was selected based on the consideration to control False Altered-protein Discovery Rate (FADR) low and obtain a reasonable number of APs.

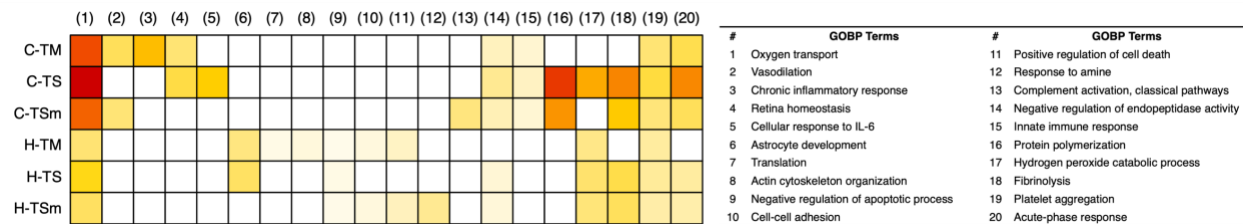

**Supplementary Figure S5.** Gene Ontology Biological Processes (GOBP) enriched from APs using DAVID.

**Supplementary Table S1.** Quantification results of rat cortical tissues.

**Supplementary Table S2.** Quantification results of rat hippocampal tissues.

**Supplementary Table S3.** Altered proteins (APs) of rat cortical tissues and classification results.

**Supplementary Table S4.** Altered proteins (APs) of rat hippocampal tissues and classification results.

**\*\*All Supplementary Tables are provided as separate Excel files.**
